# Supplementary material
Source: publisher figshare collection journal article supplement (https://sage.figshare.com/ndownloader/files/17709872)
Supplement: Supplementary file 1 [file 17709872]

## **Appendix with details on the coding of interest groups and the creation of employment categories from Department of Labor data**

The interest group data comes from the National Institute for Money in State Politics (“the Institute”).<sup>1</sup> The Institute, in turn, gathered it from the agencies in each state responsible for registering entities lobbying government from 2006 to 2015, making the data available through their website under the heading of “Lobbyist and Clients,” the interest groups and corporations being the clients.<sup>2</sup> There is, of course, only limited comparability between lists of interest groups from state to state, though the Institute claims to have been as systematic as possible in its collection of the data. Mindful of these concerns, the Institute has twice had their data evaluated by researchers at the RAND Corporation, and twice RAND has validated the way the data was collected and audited by the Institute. RAND did note, though, that each state has different registration and disclosure requirements, and different levels of rigor when it comes to ensuring compliance, making some cross-state comparisons difficult (see McGovern and Greenberg 2014, pp. 6-8).<sup>3</sup>

The overall number of original observations received was 1,806,218, but this raw data suffered from three serious problems. First, it was full of duplicate entries, often because multiple lobbyists represented the same organizations or corporations during the same year. Indeed, as Benz et al. (2011, p. 445) note in their article using state PAC contributions data from the Institute, needless duplication is a recurring problem with the Institute’s data and a great deal of “cleaning” of the data is required before it can be used. Fortunately, it was relatively simple to use STATA statistical software to identify and delete all of the duplicative entries, which reduced the data set to 577,686 observations where each organization or corporation was entered once for each year in each state rather than multiple entries in the same year.

Second, each organization or corporation was originally coded by the Institute using three columns of information, which are in order of specificity: sector, industry, and business. Presumably these were developed to clearly identify types of organizations lobbying state governments and the issues of concern to them. Yet the majority of the observations were actually not coded at all. Third, many of those that were coded were coded incorrectly. When the Institute staff were asked about this in a private communication, they claimed that they were not aware of the problem, and that there had not been any change in their coding rules or loss of internal funds dedicated to this project that might account for the growing number of un-coded entries.<sup>4</sup> Because other scholars have made some use of this data for one or two specific years (see Gray et al. 2015; Holyoke 2015), this problem with the Institute's data has become known in the community of scholars working on state interest group politics.

To solve these problems we embarked on a massive coding project. The focus on the coding is on the "sectors" category rather than the more specific categories of "industry" and "business" for two reasons. First, since "sector" is the broadest category, it is the easiest to code and have that coding be valid and reliable. Second, with just a little adjustment these sector codes correspond to National Association Industry Classification Codes (NAICS) used by the U.S. Department of Commerce, which makes it possible to link other variables (such as sector employment) to these codes.

In terms of coding the uncoded observations for group sector, a few tricks allowed us to quickly and significantly reduce their numbers. It turned out that a large number of organizations or corporations not coded in one year were coded by sector in other years. Since there is no reason to believe a group or corporation would change sector from one year to another, it was relatively simple to command statistical software to automatically find a code for a group or corporation

based on its name and then apply that same code to all other observations with the same name. This reduced the number of uncoded observations from 62% to 35%. A second technique was to use software to pick out words in a group or corporation's name that identified it as belonging in a sector category. For example, we were able to pick out all organization names containing words like "bank," "insurance," "hospital," "labor union," and "doctor" and categorize them, respectively, as "finance," "finance," "health," "union," and "health." After spending time using this technique, the number of uncoded observations fell to 26%. Along the way we discovered that there were a few thousand entries where there was no organization name, or for some reason the original coders had done such a poor job entering the name that the entry was unreadable. All of these observations were removed, reducing the total number of usable observations for the ten-year period to 532,518.

After that we spent two and a half years slogging through a process of looking up uncoded group or corporation names on the internet and assigning a code when possible. Fortunately we had the entire list sorted alphabetically, so after assigning a code to one organization in one year, we could immediately assign the same code to the same organization in all other states and years. At the same time, we eyeballed the codes originally assigned by the Institute to see whether they intuitively matched the name of the organization. If they did not, we looked them and recoded as needed. If we could not tell by just looking, we again looked up the organization.

Since the majority of the coding was done by graduate assistants, all trained with the exact same instructions, the supervising professor randomly sampled 10% of each graduate student's work and recoded them to check and see how well each student was doing. For five of the six graduate students employed, the professor's coding and the students matched in over 90% of cases. In one sad instance, however, the graduate student was found to not only be frequently miscoding,

but in a few instances had invented entirely new categories. This student was fired and the supervising professor personally recoded all 20,000 (or so) of that student's entries. It is for reasons such as these that this coding process has taken so long.

The following are the types of organizations placed into distinct policy sector categories based on the NAICS.

### **Agriculture**

- Agricultural services and products
- Crop production and basic processing
- Dairy
- Food processing and wholesale
- Livestock
- Miscellaneous agriculture
- Poultry and eggs
- Tobacco growers (but not cigars or other tobacco products)
- Fish and fisheries
- NOT forests and forestry

### **Business**

- Business services
- Cemeteries and funeral services
- Chemical and related manufacturing
- Defense and aerospace
- General contractors
- Management consulting
- Marketing and advertising
- Miscellaneous distributing
- Miscellaneous business services
- Manufacturing (all kinds)
- Retail sales
- Large pharmacy corporations (like CVS)
- Waste management services
- Recycling services
- Otherwise unidentifiable business organizations

## **Communication Industry**

- Telecommunications services and equipment
- Cable television
- Media (print and video) such as magazines and newspapers (and therefore journalism), but not fiction or academic publishing
- Telephone utilities
- Wireless internet and fiber-optics

## **Construction**

- Industry and business
- Home building
- Development of land for construction
- Landscaping
- Architecture
- Roads and highway building
- Relevant unions
- People who do AC / heating systems and electrical wiring for houses and buildings
- NOT raw materials used in building or real estate related services

## **Education**

- K-12 education
- Charter schools, private schools, religious schools, and home schooling
- Higher education
- Teachers' unions
- Private school education and management companies
- Education professionals associations
- Does NOT include boards of education and education departments, which are classified as "government," but does include their associations
- Academic publishing
- School libraries and librarians
- School transportation and health

## **Electronics**

- Computer and electronics manufacturing

- Computer equipment and services
- Other electronics services
- Software development and service

## **Energy and Natural Resources**

- Utilities
- Mining of all kinds of minerals
- Distribution of all types of power
- Forest management and logging
- Environmental services
- Hunting
- Water services and water quality
- Land use issues
- Conservation
- Environmental activism

## **Entertainment**

- Live theater and acting
- Live music (orchestras, jazz, rock, etc.)
- Musician and actors' unions
- Theater and concert venue management
- Fictional publishing
- Convention centers (but not visitors' bureaus)
- Sports and sport teams
- TV and movie filming and production

## **Finance**

- Accounting
- Banking
- Insurance (including health insurance and vehicle insurance)
- Pay-day lending and check cashing
- Investing and finance
- Financial management
- Tax services
- Securities investing

## **Government**

- All state and local government agencies
- Includes school districts, economic development agencies, and other special districts
- Includes associations representing government agencies
- Most “commissions” and all “authorities”
- Public sector unions

## **Health**

- Advocates for health care and home health care services
- Medical unions (especially nurses’ unions)
- Hospitals
- Medical service providers (doctors, dentists, nurses, etc.)
- Nursing homes
- Medical technology research companies
- Pharmaceuticals (production and pharmacies), but not big pharmacy chains
- Health care management systems
- Does NOT include health insurance providers or health insurance plans, which are classified as “finance”
- Health and medical certification boards
- NOT colleges and university medical teaching schools, but includes university hospitals

## **Lawyers and Lobbyists**

- All law firms (usually identified by a string of names followed by LLC)
- Lobbying firms may appear like law firms, but also may include words “consultants,” “public affairs,” or “advocates”
- Also includes all associations of lawyers involved with the judicial system, like groups representing judges, defense attorneys, prosecutors, and so forth (but not judicial administrative offices or associations)

## **Leisure, Food, Spirits, and Gambling**

- Hotels and resorts (and cruises)
- All alcohol production and distribution
- All forms of gambling (including horse and dog racing)
- Anything to do with beaches
- Anything to do with auto racing

- Food catering (but not food production or wholesale, or even retail supermarkets)
- Tourism industry (including travel agents)
- Hunting
- Art centers and museums
- Visitors' bureaus
- Libraries (except government libraries and university libraries)
- Outdoor outfitting / clothing / outdoor gear industry

## **Real Estate**

- Realtors and associations
- Realtor certification boards
- Title services (but not title insurance)
- Home inspection services
- Other home-selling and buying services

## **Social Service**

- General nonprofit organizations
- Welfare and social policy organizations
- Organizations involved with helping marginalized populations
- Organizations dealing with social problems like drugs and alcoholism
- Counseling services
- Veterans groups
- Religious organizations (non-activist)

## **Transportation**

- Air travel and air cargo
- Truck transportation
- Railroad transportation (people and cargo)
- Automotive industry (manufacture and sales)
- Anything in support of car travel
- Water transportation (oceans, lakes, and rivers)"
- Relevant unions

## **Interest Group Categories and Employee Categories**

Testing the paper's hypotheses required the development of a variable counting the number of people working in the various industries these groups claim to represent for each state and year. The U.S. Department of Labor has developed a large number of very precise employment categories and annually collects data from the states on how many people were employed in each category for each year.<sup>5</sup> We collected this data for the relevant years and then decided which of the Labor Department's employment categories connected to the Commerce Department's NAICS classifications. It is worth noting that Labor refined its coding scheme during these years, retiring a few categories and breaking apart a few others into narrower, more refined categories.

Below are the names of our interest group industry categories and the corresponding Labor Department employment categories. We added up the number of people employed in each category associated with each industry classification to create a final measure of the total number of people employed in that industry and thus potentially represented by those interest groups and corporations (more or less representing the workers it employs). A few categories did not have names, but since they were within bundles of categories all from the same category, they were included in that category.

### **Agriculture**

13-1021 [Buyers and Purchasing Agents, Farm Products](#)

13-1074 [Farm Labor Contractors](#)

17-2021 [Agricultural Engineers](#)

19-1010

19-1011 [Animal Scientists](#)

19-1012 [Food Scientists and Technologists](#)

19-1013 [Soil and Plant Scientists](#)

19-4011 [Agricultural and Food Science Technicians](#)

25-9021 [Farm and Home Management Advisors](#)  
37-3012 [Pesticide Handlers, Sprayers, and Applicators, Vegetation](#)  
45-1011 [First-Line Supervisors of Farming, Fishing, and Forestry Workers](#)  
45-1012  
45-2011 [Agricultural Inspectors](#)  
45-2021 [Animal Breeders](#)  
45-2041 [Graders and Sorters, Agricultural Products](#)  
45-2091 [Agricultural Equipment Operators](#)  
45-2092 [Farmworkers and Laborers, Crop, Nursery, and Greenhouse](#)  
45-2093 [Farmworkers, Farm, Ranch, and Aquacultural Animals](#)  
45-2099 [Agricultural Workers, All Other](#)  
45-3011 [Fishers and Related Fishing Workers](#)  
49-3041 [Farm Equipment Mechanics and Service Technicians](#)  
51-3021 [Butchers and Meat Cutters](#)  
51-3022 [Meat, Poultry, and Fish Cutters and Trimmers](#)  
51-3023 [Slaughterers and Meat Packers](#)  
51-3091 [Food and Tobacco Roasting, Baking, and Drying Machine Operators and Tenders](#)  
51-3092 [Food Batchmakers](#)  
51-3099 [Food Processing Workers, All Other](#)

#### Communication Industry (telephones, internet, cable TV)

15-1011 Computer and Information Scientists, Research  
15-1021 Computer Programmers  
15-1031  
15-1032  
15-1041  
15-1051  
15-1061  
15-1071  
15-1081  
15-1099  
15-1111 [Computer and Information Research Scientists](#)  
15-1121 [Computer Systems Analysts](#)

15-1122 [Information Security Analysts](#)  
15-1131 [Computer Programmers](#)  
15-1132 [Software Developers, Applications](#)  
15-1133 [Software Developers, Systems Software](#)  
15-1134 [Web Developers](#)  
15-1141 [Database Administrators](#)  
15-1142 [Network and Computer Systems Administrators](#)  
15-1143 [Computer Network Architects](#)  
15-1150  
15-1151 [Computer User Support Specialists](#)  
15-1152 [Computer Network Support Specialists](#)  
15-1179  
15-1199 [Computer Occupations, All Other](#)  
15-1799  
27-3012 [Public Address System and Other Announcers](#)  
27-3091 [Interpreters and Translators](#)  
27-3099 [Media and Communication Workers, All Other](#)  
27-4012 [Broadcast Technicians](#)  
27-4013 [Radio Operators](#)  
27-4014 [Sound Engineering Technicians](#)  
27-4099 [Media and Communication Equipment Workers, All Other](#)  
43-2011 [Switchboard Operators, Including Answering Service](#)  
43-2021 [Telephone Operators](#)  
43-2099 [Communications Equipment Operators, All Other](#)  
49-2011 [Computer, Automated Teller, and Office Machine Repairers](#)  
49-2021 [Radio, Cellular, and Tower Equipment Installers and Repairers](#)  
49-2022 [Telecommunications Equipment Installers and Repairers, Except Line Installers](#)  
49-9052 [Telecommunications Line Installers and Repairers](#)

Entertainment (performers, sports, and media)

13-1011 [Agents and Business Managers of Artists, Performers, and Athletes](#)  
13-1121 [Meeting, Convention, and Event Planners](#)  
27-1012 [Craft Artists](#)

27-1013 [Fine Artists, Including Painters, Sculptors, and Illustrators](#)  
27-1014 [Multimedia Artists and Animators](#)  
27-1019 [Artists and Related Workers, All Other](#)  
27-1027 [Set and Exhibit Designers](#)  
27-2011 [Actors](#)  
27-2012 [Producers and Directors](#)  
27-2021 [Athletes and Sports Competitors](#)  
27-2022 [Coaches and Scouts](#)  
27-2023 [Umpires, Referees, and Other Sports Officials](#)  
27-2031 [Dancers](#)  
27-2032 [Choreographers](#)  
27-2041 [Music Directors and Composers](#)  
27-2042 [Musicians and Singers](#)  
27-2099 [Entertainers and Performers, Sports and Related Workers, All Other](#)  
27-3020 News Analysts, Reporters, and Correspondants  
27-3021 [Broadcast News Analysts](#)  
27-3022 [Reporters and Correspondents](#)  
27-3041 [Editors](#)  
27-3043 [Writers and Authors](#)  
27-4011 [Audio and Video Equipment Technicians](#)  
27-4021 [Photographers](#)  
27-4031 [Camera Operators, Television, Video, and Motion Picture](#)  
27-4032 [Film and Video Editors](#)  
29-9091 [Athletic Trainers](#)  
39-2011 [Animal Trainers](#)  
39-2021 [Nonfarm Animal Caretakers](#)  
39-3021 [Motion Picture Projectionists](#)  
39-5091 [Makeup Artists, Theatrical and Performance](#)  
43-9031 [Desktop Publishers](#)  
43-9081 [Proofreaders and Copy Markers](#)  
49-9061 [Camera and Photographic Equipment Repairers](#)  
49-9063 [Musical Instrument Repairers and Tuners](#)  
51-5111 [Prepress Technicians and Workers](#)

- 51-5112 [Printing Press Operators](#)
- 51-5113 [Print Binding and Finishing Workers](#)

## Electronics

- 17-2061 [Computer Hardware Engineers](#)
- 17-2072 [Electronics Engineers, Except Computer](#)
- 17-3012 [Electrical and Electronics Drafters](#)
- 17-3023 [Electrical and Electronics Engineering Technicians](#)
- 17-3024 [Electro-Mechanical Technicians](#)
- 27-3042 [Technical Writers](#)
- 43-9011 [Computer Operators](#)
- 49-2094 [Electrical and Electronics Repairers, Commercial and Industrial Equipment](#)
- 49-2095 [Electrical and Electronics Repairers, Powerhouse, Substation, and Relay](#)
- 49-2097 [Electronic Home Entertainment Equipment Installers and Repairers](#)
- 49-9062 [Medical Equipment Repairers](#)
- 51-2021 [Coil Winders, Tapers, and Finishers](#)
- 51-2022 [Electrical and Electronic Equipment Assemblers](#)
- 51-2023 [Electromechanical Equipment Assemblers](#)
- 51-4012 [Computer Numerically Controlled Machine Tool Programmers, Metal and Plastic](#)
- 51-9141 [Semiconductor Processors](#)

## Construction

- 17-1011 [Architects, Except Landscape and Naval](#)
- 17-1012 [Landscape Architects](#)
- 17-1022 [Surveyors](#)
- 17-2051 [Civil Engineers](#)
- 17-2131 [Materials Engineers](#)
- 17-3011 [Architectural and Civil Drafters](#)
- 17-3013 [Mechanical Drafters](#)
- 17-3019 [Drafters, All Other](#)
- 17-3022 [Civil Engineering Technicians](#)
- 17-3026 [Industrial Engineering Technicians](#)

17-3031 [Surveying and Mapping Technicians](#)  
19-2032 [Materials Scientists](#)  
27-1021 [Commercial and Industrial Designers](#)  
27-1025 [Interior Designers](#)  
47-1011 [First-Line Supervisors of Construction Trades and Extraction Workers](#)  
47-2011 [Boilermakers](#)  
47-2021 [Brickmasons and Blockmasons](#)  
47-2022 [Stonemasons](#)  
47-2031 [Carpenters](#)  
47-2041 [Carpet Installers](#)  
47-2042 [Floor Layers, Except Carpet, Wood, and Hard Tiles](#)  
47-2043 [Floor Sanders and Finishers](#)  
47-2044 [Tile and Marble Setters](#)  
47-2051 [Cement Masons and Concrete Finishers](#)  
47-2053 [Terrazzo Workers and Finishers](#)  
47-2061 [Construction Laborers](#)  
47-2071 [Paving, Surfacing, and Tamping Equipment Operators](#)  
47-2072 [Pile-Driver Operators](#)  
47-2073 [Operating Engineers and Other Construction Equipment Operators](#)  
47-2081 [Drywall and Ceiling Tile Installers](#)  
47-2082 [Tapers](#)  
47-2111 [Electricians](#)  
47-2121 [Glaziers](#)  
47-2130 [Insulation workers](#)  
47-2131 [Insulation Workers, Floor, Ceiling, and Wall](#)  
47-2132 [Insulation Workers, Mechanical](#)  
47-2141 [Painters, Construction and Maintenance](#)  
47-2142 [Paperhangers](#)  
47-2151 [Pipelayers](#)  
47-2152 [Plumbers, Pipefitters, and Steamfitters](#)  
47-2161 [Plasterers and Stucco Masons](#)  
47-2171 [Reinforcing Iron and Rebar Workers](#)  
47-2181 [Roofers](#)

47-2231 [Solar Photovoltaic Installers](#)  
47-3011 [Helpers--Brickmasons, Blockmasons, Stonemasons, and Tile and Marble Setters](#)  
47-3012 [Helpers--Carpenters](#)  
47-3013 [Helpers--Electricians](#)  
47-3014 [Helpers--Painters, Paperhangers, Plasterers, and Stucco Masons](#)  
47-3015 [Helpers--Pipelayers, Plumbers, Pipefitters, and Steamfitters](#)  
47-3016 [Helpers--Roofers](#)  
47-3019 [Helpers, Construction Trades, All Other](#)  
47-4011 [Construction and Building Inspectors](#)  
47-4021 [Elevator Installers and Repairers](#)  
47-4031 [Fence Erectors](#)  
47-4051 [Highway Maintenance Workers](#)  
47-4061 [Rail-Track Laying and Maintenance Equipment Operators](#)  
47-4071 [Septic Tank Servicers and Sewer Pipe Cleaners](#)  
47-4091 [Segmental Pavers](#)  
47-4099 [Construction and Related Workers, All Other](#)  
47-4799 Construction and Related Workers  
49-1011 [First-Line Supervisors of Mechanics, Installers, and Repairers](#)  
49-2098 [Security and Fire Alarm Systems Installers](#)  
49-9011 [Mechanical Door Repairers](#)  
49-9012 [Control and Valve Installers and Repairers, Except Mechanical Door](#)  
49-9021 [Heating, Air Conditioning, and Refrigeration Mechanics and Installers](#)  
49-9042 Maintenance and Repair Workers  
49-9071 [Maintenance and Repair Workers, General](#)  
49-9095 [Manufactured Building and Mobile Home Installers](#)  
49-9098 [Helpers--Installation, Maintenance, and Repair Workers](#)  
49-9099 [Installation, Maintenance, and Repair Workers, All Other](#)  
49-9799 Insulation, Maintenance, and Repair Workers, All Others  
51-4011 [Computer-Controlled Machine Tool Operators, Metal and Plastic](#)  
51-4031 [Cutting, Punching, and Press Machine Setters, Operators, and Tenders, Metal and Plastic](#)  
51-4033 [Grinding, Lapping, Polishing, and Buffing Machine Tool Setters, Operators, and Tenders, Metal and Plastic](#)  
51-4034 [Lathe and Turning Machine Tool Setters, Operators, and Tenders, Metal and Plastic](#)

51-4035 [Milling and Planing Machine Setters, Operators, and Tenders, Metal and Plastic](#)  
51-9022 [Grinding and Polishing Workers, Hand](#)  
51-9023 [Mixing and Blending Machine Setters, Operators, and Tenders](#)  
51-9121 [Coating, Painting, and Spraying Machine Setters, Operators, and Tenders](#)  
51-9123 [Painting, Coating, and Decorating Workers](#)  
53-7021 [Crane and Tower Operators](#)  
53-7032 [Excavating and Loading Machine and Dragline Operators](#)  
53-7041 [Hoist and Winch Operators](#)

### Energy Production and Natural Resources

17-2071 [Electrical Engineers](#)  
17-2081 [Environmental Engineers](#)  
17-2151 [Mining and Geological Engineers, Including Mining Safety Engineers](#)  
17-2161 [Nuclear Engineers](#)  
17-2171 [Petroleum Engineers](#)  
17-3025 [Environmental Engineering Technicians](#)  
19-1023 [Zoologists and Wildlife Biologists](#)  
19-1031 [Conservation Scientists](#)  
19-1032 [Foresters](#)  
19-2041 [Environmental Scientists and Specialists, Including Health](#)  
19-2042 [Geoscientists, Except Hydrologists and Geographers](#)  
19-2043 [Hydrologists](#)  
19-4041 [Geological and Petroleum Technicians](#)  
19-4051 [Nuclear Technicians](#)  
19-4091 [Environmental Science and Protection Technicians, Including Health](#)  
19-4093 [Forest and Conservation Technicians](#)  
43-5041 [Meter Readers, Utilities](#)  
45-4011 [Forest and Conservation Workers](#)  
45-4021 [Fallers](#)  
45-4022 [Logging Equipment Operators](#)  
45-4023 [Log Graders and Scalers](#)  
45-4029 [Logging Workers, All Other](#)  
47-4041 [Hazardous Materials Removal Workers](#)

47-5011 [Derrick Operators, Oil and Gas](#)  
47-5012 [Rotary Drill Operators, Oil and Gas](#)  
47-5013 [Service Unit Operators, Oil, Gas, and Mining](#)  
47-5021 [Earth Drillers, Except Oil and Gas](#)  
47-5031 [Explosives Workers, Ordnance Handling Experts, and Blasters](#)  
47-5041 [Continuous Mining Machine Operators](#)  
47-5042 [Mine Cutting and Channeling Machine Operators](#)  
47-5049 [Mining Machine Operators, All Other](#)  
47-5051 [Rock Splitters, Quarry](#)  
47-5061 [Roof Bolters, Mining](#)  
47-5071 [Roustabouts, Oil and Gas](#)  
47-5081 [Helpers--Extraction Workers](#)  
47-5099 [Extraction Workers, All Other](#)  
49-9051 [Electrical Power-Line Installers and Repairers](#)  
49-9081 [Wind Turbine Service Technicians](#)  
49-9096 [Riggers](#)  
51-4032 [Drilling and Boring Machine Tool Setters, Operators, and Tenders, Metal and Plastic](#)  
51-8011 [Nuclear Power Reactor Operators](#)  
51-8012 [Power Distributors and Dispatchers](#)  
51-8013 [Power Plant Operators](#)  
51-8031 [Water and Wastewater Treatment Plant and System Operators](#)  
51-8092 [Gas Plant Operators](#)  
51-8093 [Petroleum Pump System Operators, Refinery Operators, and Gaugers](#)  
51-9021 [Crushing, Grinding, and Polishing Machine Setters, Operators, and Tenders](#)  
53-7031 [Dredge Operators](#)  
53-7033 [Loading Machine Operators, Underground Mining](#)  
53-7073 [Wellhead Pumpers](#)  
53-7111 [Mine Shuttle Car Operators](#)

## Real Estate

13-2021 [Appraisers and Assessors of Real Estate](#)  
41-9021 [Real Estate Brokers](#)  
41-9022 [Real Estate Sales Agents](#)

## Finance and Insurance

- 13-1031 [Claims Adjusters, Examiners, and Investigators](#)
- 13-1032 [Insurance Appraisers, Auto Damage](#)
- 13-1072 Compensation, Benefits, and Job Analyst Specialists
- 13-1141 [Compensation, Benefits, and Job Analysis Specialists](#)
- 13-2011 [Accountants and Auditors](#)
- 13-2031 [Budget Analysts](#)
- 13-2041 [Credit Analysts](#)
- 13-2051 [Financial Analysts](#)
- 13-2052 [Personal Financial Advisors](#)
- 13-2053 [Insurance Underwriters](#)
- 13-2061 [Financial Examiners](#)
- 13-2071 [Credit Counselors](#)
- 13-2072 [Loan Officers](#)
- 13-2081 [Tax Examiners and Collectors, and Revenue Agents](#)
- 13-2082 [Tax Preparers](#)
- 13-2099 [Financial Specialists, All Other](#)
- 15-2011 [Actuaries](#)
- 19-3011 [Economists](#)
- 41-3021 [Insurance Sales Agents](#)
- 41-3031 [Securities, Commodities, and Financial Services Sales Agents](#)
- 43-3071 [Tellers](#)
- 43-3099 [Financial Clerks, All Other](#)
- 43-4011 [Brokerage Clerks](#)
- 43-4041 [Credit Authorizers, Checkers, and Clerks](#)
- 43-4111 [Interviewers, Except Eligibility and Loan](#)
- 43-4131 [Loan Interviewers and Clerks](#)
- 43-4141 [New Accounts Clerks](#)
- 43-9041 [Insurance Claims and Policy Processing Clerks](#)

## Leisure and Entertainment

- 25-4010 Archivists, Curators, and Museum Technicians
- 25-4011 [Archivists](#)
- 25-4012 [Curators](#)
- 25-4013 [Museum Technicians and Conservators](#)
- 25-4021 [Librarians](#)
- 25-4031 [Library Technicians](#)
- 25-9011 [Audio-Visual and Multimedia Collections Specialists](#)
- 27-1011 [Art Directors](#)
- 27-3010 Announcers
- 27-3011 [Radio and Television Announcers](#)
- 33-9092 [Lifeguards, Ski Patrol, and Other Recreational Protective Service Workers](#)
- 35-1011 [Chefs and Head Cooks](#)
- 35-1012 [First-Line Supervisors of Food Preparation and Serving Workers](#)
- 35-2011 [Cooks, Fast Food](#)
- 35-2012 [Cooks, Institution and Cafeteria](#)
- 35-2013 [Cooks, Private Household](#)
- 35-2014 [Cooks, Restaurant](#)
- 35-2015 [Cooks, Short Order](#)
- 35-2019 [Cooks, All Other](#)
- 35-2021 [Food Preparation Workers](#)
- 35-3011 [Bartenders](#)
- 35-3021 [Combined Food Preparation and Serving Workers, Including Fast Food](#)
- 35-3022 [Counter Attendants, Cafeteria, Food Concession, and Coffee Shop](#)
- 35-3031 [Waiters and Waitresses](#)
- 35-3041 [Food Servers, Nonrestaurant](#)
- 35-9011 [Dining Room and Cafeteria Attendants and Bartender Helpers](#)
- 35-9021 [Dishwashers](#)
- 35-9031 [Hosts and Hostesses, Restaurant, Lounge, and Coffee Shop](#)
- 35-9099 [Food Preparation and Serving Related Workers, All Other](#)
- 37-2012 [Maids and Housekeeping Cleaners](#)
- 39-1011 [Gaming Supervisors](#)
- 39-1012 [Slot Supervisors](#)

39-3011 [Gaming Dealers](#)  
39-3012 [Gaming and Sports Book Writers and Runners](#)  
39-3019 [Gaming Service Workers, All Other](#)  
39-3031 [Ushers, Lobby Attendants, and Ticket Takers](#)  
39-3091 [Amusement and Recreation Attendants](#)  
39-3092 [Costume Attendants](#)  
39-3093 [Locker Room, Coatroom, and Dressing Room Attendants](#)  
39-3099 [Entertainment Attendants and Related Workers, All Other](#)  
39-6011 [Baggage Porters and Bellhops](#)  
39-6012 [Concierges](#)  
39-6021 Tour Guides and Escorts  
39-6022 Travel Guides  
39-7011 [Tour Guides and Escorts](#)  
39-7012 [Travel Guides](#)  
39-9031 [Fitness Trainers and Aerobics Instructors](#)  
39-9032 [Recreation Workers](#)  
41-2012 [Gaming Change Persons and Booth Cashiers](#)  
41-3041 [Travel Agents](#)  
43-3041 [Gaming Cage Workers](#)  
43-4081 [Hotel, Motel, and Resort Desk Clerks](#)  
43-4121 [Library Assistants, Clerical](#)  
43-4181 [Reservation and Transportation Ticket Agents and Travel Clerks](#)  
45-3021 Hunters and Trappers  
49-9091 [Coin, Vending, and Amusement Machine Servicers and Repairers](#)  
49-9092 [Commercial Divers](#)  
51-3011 [Bakers](#)  
51-3093 [Food Cooking Machine Operators and Tenders](#)

Business (including Manufacturing, Sales, and Services)

13-1022 [Wholesale and Retail Buyers, Except Farm Products](#)  
13-1023 [Purchasing Agents, Except Wholesale, Retail, and Farm Products](#)  
13-1041 [Compliance Officers](#)  
13-1051 [Cost Estimators](#)

13-1071 [Human Resources Specialists](#)  
13-1073 Training and Development Specialists  
13-1075 [Labor Relations Specialists](#)  
13-1079  
13-1081 [Logisticians](#)  
13-1111 [Management Analysts](#)  
13-1151 [Training and Development Specialists](#)  
13-1161 [Market Research Analysts and Marketing Specialists](#)  
13-1199 [Business Operations Specialists, All Other](#)  
15-2031 [Operations Research Analysts](#)  
15-2091 [Mathematical Technicians](#)  
17-1021 [Cartographers and Photogrammetrists](#)  
17-2011 [Aerospace Engineers](#)  
17-2041 [Chemical Engineers](#)  
17-2111 [Health and Safety Engineers, Except Mining Safety Engineers and Inspectors](#)  
17-2112 [Industrial Engineers](#)  
17-2121 [Marine Engineers and Naval Architects](#)  
17-2141 [Mechanical Engineers](#)  
17-2199 [Engineers, All Other](#)  
17-3021 [Aerospace Engineering and Operations Technicians](#)  
17-3027 [Mechanical Engineering Technicians](#)  
17-3029 [Engineering Technicians, Except Drafters, All Other](#)  
19-2031 [Chemists](#)  
19-3021  
19-3032 [Industrial-Organizational Psychologists](#)  
19-4031 [Chemical Technicians](#)  
19-4099 [Life, Physical, and Social Science Technicians, All Other](#)  
21-1798  
27-1022 [Fashion Designers](#)  
27-1023 [Floral Designers](#)  
27-1024 [Graphic Designers](#)  
27-1026 [Merchandise Displayers and Window Trimmers](#)  
27-1029 [Designers, All Other](#)

27-3031 [Public Relations Specialists](#)  
33-9021 [Private Detectives and Investigators](#)  
33-9032 [Security Guards](#)  
37-1011 [First-Line Supervisors of Housekeeping and Janitorial Workers](#)  
37-1012 [First-Line Supervisors of Landscaping, Lawn Service, and Groundskeeping Workers](#)  
37-2011 [Janitors and Cleaners, Except Maids and Housekeeping Cleaners](#)  
37-2019 [Building Cleaning Workers, All Other](#)  
37-2021 [Pest Control Workers](#)  
37-3011 [Landscaping and Groundskeeping Workers](#)  
37-3013 [Tree Trimmers and Pruners](#)  
37-3019 [Grounds Maintenance Workers, All Other](#)  
39-1021 [First-Line Supervisors of Personal Service Workers](#)  
39-4011 [Embalmers](#)  
39-4021 [Funeral Attendants](#)  
39-4031 [Morticians, Undertakers, and Funeral Directors](#)  
39-4831 [Funeral Service Managers, Directors, Morticians, and Undertakers](#)  
39-5011 [Barbers](#)  
39-5012 [Hairdressers, Hairstylists, and Cosmetologists](#)  
39-5092 [Manicurists and Pedicurists](#)  
39-5093 [Shampooers](#)  
39-5094 [Skincare Specialists](#)  
39-9021 [Personal Care Aides](#)  
39-9099 [Personal Care and Service Workers, All Other](#)  
41-1011 [First-Line Supervisors of Retail Sales Workers](#)  
41-1012 [First-Line Supervisors of Non-Retail Sales Workers](#)  
41-2011 [Cashiers](#)  
41-2021 [Counter and Rental Clerks](#)  
41-2022 [Parts Salespersons](#)  
41-2031 [Retail Salespersons](#)  
41-3011 [Advertising Sales Agents](#)  
41-3099 [Sales Representatives, Services, All Other](#)  
41-4011 [Sales Representatives, Wholesale and Manufacturing, Technical and Scientific Products](#)

41-4012 [Sales Representatives, Wholesale and Manufacturing, Except Technical and Scientific Products](#)

41-9011 [Demonstrators and Product Promoters](#)

41-9012 [Models](#)

41-9031 [Sales Engineers](#)

41-9041 [Telemarketers](#)

41-9091 [Door-to-Door Sales Workers, News and Street Vendors, and Related Workers](#)

41-9099 [Sales and Related Workers, All Other](#)

41-9799 Sales and Related Workers, All Others

43-1011 [First-Line Supervisors of Office and Administrative Support Workers](#)

43-3011 [Bill and Account Collectors](#)

43-3021 [Billing and Posting Clerks](#)

43-3031 [Bookkeeping, Accounting, and Auditing Clerks](#)

43-3051 [Payroll and Timekeeping Clerks](#)

43-3061 [Procurement Clerks](#)

43-4021 [Correspondence Clerks](#)

43-4051 [Customer Service Representatives](#)

43-4071 [File Clerks](#)

43-4161 [Human Resources Assistants, Except Payroll and Timekeeping](#)

43-5061 [Production, Planning, and Expediting Clerks](#)

43-5081 [Stock Clerks and Order Fillers](#)

43-5111 [Weighers, Measurers, Checkers, and Samplers, Recordkeeping](#)

43-6011 [Executive Secretaries and Executive Administrative Assistants](#)

43-6014 [Secretaries and Administrative Assistants, Except Legal, Medical, and Executive](#)

43-9799 Office and Administrative Support Workers, All Others

43-4151 [Order Clerks](#)

43-4171 [Receptionists and Information Clerks](#)

43-4199 [Information and Record Clerks, All Other](#)

43-5021 [Couriers and Messengers](#)

43-9021 [Data Entry Keyers](#)

43-9022 [Word Processors and Typists](#)

43-9051 [Mail Clerks and Mail Machine Operators, Except Postal Service](#)

43-9061 [Office Clerks, General](#)

43-9071 [Office Machine Operators, Except Computer](#)  
43-9111 [Statistical Assistants](#)  
43-9199 [Office and Administrative Support Workers, All Other](#)  
47-2211 [Sheet Metal Workers](#)  
47-2221 [Structural Iron and Steel Workers](#)  
49-2092 [Electric Motor, Power Tool, and Related Repairers](#)  
49-3021 [Automotive Body and Related Repairers](#)  
49-3022 [Automotive Glass Installers and Repairers](#)  
49-3023 [Automotive Service Technicians and Mechanics](#)  
49-3051 [Motorboat Mechanics and Service Technicians](#)  
49-3052 [Motorcycle Mechanics](#)  
49-3053 [Outdoor Power Equipment and Other Small Engine Mechanics](#)  
49-3091 [Bicycle Repairers](#)  
49-3092 [Recreational Vehicle Service Technicians](#)  
49-3093 [Tire Repairers and Changers](#)  
49-9031 [Home Appliance Repairers](#)  
49-9041 [Industrial Machinery Mechanics](#)  
49-9043 [Maintenance Workers, Machinery](#)  
49-9044 [Millwrights](#)  
49-9045 [Refractory Materials Repairers, Except Brickmasons](#)  
49-9064 [Watch Repairers](#)  
49-9069 [Precision Instrument and Equipment Repairers, All Other](#)  
49-9093 [Fabric Menders, Except Garment](#)  
49-9094 [Locksmiths and Safe Repairers](#)  
51-1011 [First-Line Supervisors of Production and Operating Workers](#)  
51-2031 [Engine and Other Machine Assemblers](#)  
51-2041 [Structural Metal Fabricators and Fitters](#)  
51-2091 [Fiberglass Laminators and Fabricators](#)  
51-2092 [Team Assemblers](#)  
51-2093 [Timing Device Assemblers and Adjusters](#)  
51-2099 [Assemblers and Fabricators, All Other](#)  
51-4021 [Extruding and Drawing Machine Setters, Operators, and Tenders, Metal and Plastic](#)  
51-4022 [Forging Machine Setters, Operators, and Tenders, Metal and Plastic](#)

51-4023 [Rolling Machine Setters, Operators, and Tenders, Metal and Plastic](#)  
51-4041 [Machinists](#)  
51-4051 [Metal-Refining Furnace Operators and Tenders](#)  
51-4052 [Pourers and Casters, Metal](#)  
51-4061 [Model Makers, Metal and Plastic](#)  
51-4062 [Patternmakers, Metal and Plastic](#)  
51-4071 [Foundry Mold and Coremakers](#)  
51-4072 [Molding, Coremaking, and Casting Machine Setters, Operators, and Tenders, Metal and Plastic](#)  
51-4081 [Multiple Machine Tool Setters, Operators, and Tenders, Metal and Plastic](#)  
51-4111 [Tool and Die Makers](#)  
51-4121 [Welders, Cutters, Solderers, and Brazers](#)  
51-4122 [Welding, Soldering, and Brazing Machine Setters, Operators, and Tenders](#)  
51-4191 [Heat Treating Equipment Setters, Operators, and Tenders, Metal and Plastic](#)  
51-4192 [Layout Workers, Metal and Plastic](#)  
51-4193 [Plating and Coating Machine Setters, Operators, and Tenders, Metal and Plastic](#)  
51-4194 [Tool Grinders, Filers, and Sharpeners](#)  
51-4199 [Metal Workers and Plastic Workers, All Other](#)  
51-5011 Bindery Workers  
51-5012 Bookbinders  
51-5021 Job Printers  
51-5022 Prepress Technicians and Workers  
51-5023 Printing Machine Operators  
51-6011 [Laundry and Dry-Cleaning Workers](#)  
51-6021 [Pressers, Textile, Garment, and Related Materials](#)  
51-6031 [Sewing Machine Operators](#)  
51-6041 [Shoe and Leather Workers and Repairers](#)  
51-6042 [Shoe Machine Operators and Tenders](#)  
51-6051 [Sewers, Hand](#)  
51-6052 [Tailors, Dressmakers, and Custom Sewers](#)  
51-6061 [Textile Bleaching and Dyeing Machine Operators and Tenders](#)  
51-6062 [Textile Cutting Machine Setters, Operators, and Tenders](#)  
51-6063 [Textile Knitting and Weaving Machine Setters, Operators, and Tenders](#)

51-6064 [Textile Winding, Twisting, and Drawing Out Machine Setters, Operators, and Tenders](#)

51-6091 [Extruding and Forming Machine Setters, Operators, and Tenders, Synthetic and Glass Fibers](#)

51-6092 [Fabric and Apparel Patternmakers](#)

51-6093 [Upholsterers](#)

51-6099 [Textile, Apparel, and Furnishings Workers, All Other](#)

51-7011 [Cabinetmakers and Bench Carpenters](#)

51-7021 [Furniture Finishers](#)

51-7031 [Model Makers, Wood](#)

51-7032 [Patternmakers, Wood](#)

51-7041 [Sawing Machine Setters, Operators, and Tenders, Wood](#)

51-7042 [Woodworking Machine Setters, Operators, and Tenders, Except Sawing](#)

51-7099 [Woodworkers, All Other](#)

51-8021 [Stationary Engineers and Boiler Operators](#)

51-8091 [Chemical Plant and System Operators](#)

51-8099 [Plant and System Operators, All Other](#)

51-9011 [Chemical Equipment Operators and Tenders](#)

51-9012 [Separating, Filtering, Clarifying, Precipitating, and Still Machine Setters, Operators, and Tenders](#)

51-9031 [Cutters and Trimmers, Hand](#)

51-9032 [Cutting and Slicing Machine Setters, Operators, and Tenders](#)

51-9041 [Extruding, Forming, Pressing, and Compacting Machine Setters, Operators, and Tenders](#)

51-9051 [Furnace, Kiln, Oven, Drier, and Kettle Operators and Tenders](#)

51-9061 [Inspectors, Testers, Sorters, Samplers, and Weighers](#)

51-9071 [Jewelers and Precious Stone and Metal Workers](#)

51-9111 [Packaging and Filling Machine Operators and Tenders](#)

51-9131 Photographer Process Workers

51-9132 Photographer Processing Machine Operators

51-9151 [Photographic Process Workers and Processing Machine Operators](#)

51-9191 [Adhesive Bonding Machine Operators and Tenders](#)

51-9192 [Cleaning, Washing, and Metal Pickling Equipment Operators and Tenders](#)

51-9193 [Cooling and Freezing Equipment Operators and Tenders](#)

51-9194 [Etchers and Engravers](#)

51-9195 [Molders, Shapers, and Casters, Except Metal and Plastic](#)  
51-9196 [Paper Goods Machine Setters, Operators, and Tenders](#)  
51-9197 [Tire Builders](#)  
51-9198 [Helpers--Production Workers](#)  
51-9199 [Production Workers, All Other](#)  
[51-9399 Production Workers, All Others](#)  
53-1021 [First-Line Supervisors of Helpers, Laborers, and Material Movers, Hand](#)  
53-7011 [Conveyor Operators and Tenders](#)  
53-7063 [Machine Feeders and Offbearers](#)  
53-7064 [Packers and Packagers, Hand](#)  
53-7071 [Gas Compressor and Gas Pumping Station Operators](#)  
53-7072 [Pump Operators, Except Wellhead Pumpers](#)  
53-7081 [Refuse and Recyclable Material Collectors](#)

## Education

15-2021 [Mathematicians](#)  
15-2041 [Statisticians](#)  
15-2099 [Mathematical Science Occupations, All Other](#)  
19-1029 [Biological Scientists, All Other](#)  
19-2011 [Astronomers](#)  
19-2012 [Physicists](#)  
19-2021 [Atmospheric and Space Scientists](#)  
19-2099 [Physical Scientists, All Other](#)  
19-3022 [Survey Researchers](#)  
19-3041 [Sociologists](#)  
19-3091 [Anthropologists and Archeologists](#)  
19-3092 [Geographers](#)  
19-3093 [Historians](#)  
19-3094 [Political Scientists](#)  
19-3099 [Social Scientists and Related Workers, All Other](#)  
19-4061 [Social Science Research Assistants](#)  
21-1091 [Health Educators](#)  
25-1011 [Business Teachers, Postsecondary](#)

25-1021 [Computer Science Teachers, Postsecondary](#)  
25-1022 [Mathematical Science Teachers, Postsecondary](#)  
25-1031 [Architecture Teachers, Postsecondary](#)  
25-1032 [Engineering Teachers, Postsecondary](#)  
25-1041 [Agricultural Sciences Teachers, Postsecondary](#)  
25-1042 [Biological Science Teachers, Postsecondary](#)  
25-1043 [Forestry and Conservation Science Teachers, Postsecondary](#)  
25-1051 [Atmospheric, Earth, Marine, and Space Sciences Teachers, Postsecondary](#)  
25-1052 [Chemistry Teachers, Postsecondary](#)  
25-1053 [Environmental Science Teachers, Postsecondary](#)  
25-1054 [Physics Teachers, Postsecondary](#)  
25-1061 [Anthropology and Archeology Teachers, Postsecondary](#)  
25-1062 [Area, Ethnic, and Cultural Studies Teachers, Postsecondary](#)  
25-1063 [Economics Teachers, Postsecondary](#)  
25-1064 [Geography Teachers, Postsecondary](#)  
25-1065 [Political Science Teachers, Postsecondary](#)  
25-1066 [Psychology Teachers, Postsecondary](#)  
25-1067 [Sociology Teachers, Postsecondary](#)  
25-1069 [Social Sciences Teachers, Postsecondary, All Other](#)  
25-1071 [Health Specialties Teachers, Postsecondary](#)  
25-1072 [Nursing Instructors and Teachers, Postsecondary](#)  
25-1081 [Education Teachers, Postsecondary](#)  
25-1082 [Library Science Teachers, Postsecondary](#)  
25-1111 [Criminal Justice and Law Enforcement Teachers, Postsecondary](#)  
25-1112 [Law Teachers, Postsecondary](#)  
25-1113 [Social Work Teachers, Postsecondary](#)  
25-1121 [Art, Drama, and Music Teachers, Postsecondary](#)  
25-1122 [Communications Teachers, Postsecondary](#)  
25-1123 [English Language and Literature Teachers, Postsecondary](#)  
25-1124 [Foreign Language and Literature Teachers, Postsecondary](#)  
25-1125 [History Teachers, Postsecondary](#)  
25-1126 [Philosophy and Religion Teachers, Postsecondary](#)  
25-1191 [Graduate Teaching Assistants](#)

25-1192 [Home Economics Teachers, Postsecondary](#)  
 25-1193 [Recreation and Fitness Studies Teachers, Postsecondary](#)  
 25-1194 [Vocational Education Teachers, Postsecondary](#)  
 25-1199 [Postsecondary Teachers, All Other](#)  
 25-2011 [Preschool Teachers, Except Special Education](#)  
 25-2012 [Kindergarten Teachers, Except Special Education](#)  
 25-2021 [Elementary School Teachers, Except Special Education](#)  
 25-2022 [Middle School Teachers, Except Special and Career/Technical Education](#)  
 25-2023 [Career/Technical Education Teachers, Middle School](#)  
 25-2031 [Secondary School Teachers, Except Special and Career/Technical Education](#)  
 25-2032 [Career/Technical Education Teachers, Secondary School](#)  
 25-2041 Special Education Teachers, Preschool, Kindergarten, and Elementary School  
 25-2042 Special Education Teachers, Middle School  
 25-2043 Special Education Teachers, Secondary School  
 25-2051 [Special Education Teachers, Preschool](#)  
 25-2052 [Special Education Teachers, Kindergarten and Elementary School](#)  
 25-2053 [Special Education Teachers, Middle School](#)  
 25-2054 [Special Education Teachers, Secondary School](#)  
 25-2059 [Special Education Teachers, All Other](#)  
 25-3011 [Adult Basic and Secondary Education and Literacy Teachers and Instructors](#)  
 25-3021 [Self-Enrichment Education Teachers](#)  
 25-3098 [Substitute Teachers](#)  
 25-3099 [Teachers and Instructors, All Other, Except Substitute Teachers](#)  
 25-3999 Teachers, All Others  
 25-9031 [Instructional Coordinators](#)  
 25-9041 [Teacher Assistants](#)  
 25-9099 [Education, Training, and Library Workers, All Other](#)  
 53-3022 [Bus Drivers, School or Special Client](#)

#### Nonprofit / social services

13-1131 [Fundraisers](#)  
 19-3031 [Clinical, Counseling, and School Psychologists](#)  
 21-1011 [Substance Abuse and Behavioral Disorder Counselors](#)

21-1012 [Educational, Guidance, School, and Vocational Counselors](#)  
21-1013 [Marriage and Family Therapists](#)  
21-1014 [Mental Health Counselors](#)  
21-1015 [Rehabilitation Counselors](#)  
21-1019 [Counselors, All Other](#)  
21-1021 [Child, Family, and School Social Workers](#)  
21-1022 [Healthcare Social Workers](#)  
21-1023 [Mental Health and Substance Abuse Social Workers](#)  
21-1029 [Social Workers, All Other](#)  
21-1092 [Probation Officers and Correctional Treatment Specialists](#)  
21-1093 [Social and Human Service Assistants](#)  
21-1094 [Community Health Workers](#)  
21-1099 [Community and Social Service Specialists, All Other](#)  
21-2011 [Clergy](#)  
21-2021 [Directors, Religious Activities and Education](#)  
21-2099 [Religious Workers, All Other](#)  
39-9041 [Residential Advisors](#)  
39-9011 [Childcare Workers](#)  
43-4061 [Eligibility Interviewers, Government Programs](#)

## Health

17-2031 [Biomedical Engineers](#)  
19-1021 [Biochemists and Biophysicists](#)  
19-1022 [Microbiologists](#)  
19-1041 [Epidemiologists](#)  
19-1042 [Medical Scientists, Except Epidemiologists](#)  
19-1099 [Life Scientists, All Other](#)  
19-3039 [Psychologists, All Other](#)  
19-4021 [Biological Technicians](#)  
29-1011 [Chiropractors](#)  
29-1020 [Dentists](#)  
29-1021 [Dentists, General](#)  
29-1022 [Oral and Maxillofacial Surgeons](#)

29-1023 [Orthodontists](#)  
29-1024 [Prosthodontists](#)  
29-1029 [Dentists, All Other Specialists](#)  
29-1031 [Dietitians and Nutritionists](#)  
29-1041 [Optometrists](#)  
29-1051 [Pharmacists](#)  
29-1061 [Anesthesiologists](#)  
29-1062 [Family and General Practitioners](#)  
29-1063 [Internists, General](#)  
29-1064 [Obstetricians and Gynecologists](#)  
29-1065 [Pediatricians, General](#)  
29-1066 [Psychiatrists](#)  
29-1067 [Surgeons](#)  
29-1069 [Physicians and Surgeons, All Other](#)  
29-1071 [Physician Assistants](#)  
29-1081 [Podiatrists](#)  
29-1111 Registered Nurses  
29-1121 Audiologists  
29-1122 [Occupational Therapists](#)  
29-1123 [Physical Therapists](#)  
29-1124 [Radiation Therapists](#)  
29-1125 [Recreational Therapists](#)  
29-1126 [Respiratory Therapists](#)  
29-1127 [Speech-Language Pathologists](#)  
29-1128 [Exercise Physiologists](#)  
29-1129 [Therapists, All Other](#)  
29-1131 [Veterinarians](#)  
29-1141 [Registered Nurses](#)  
29-1151 [Nurse Anesthetists](#)  
29-1161 [Nurse Midwives](#)  
29-1171 [Nurse Practitioners](#)  
29-1181 [Audiologists](#)  
29-1199 [Health Diagnosing and Treating Practitioners, All Other](#)

29-2011 [Medical and Clinical Laboratory Technologists](#)  
29-2012 [Medical and Clinical Laboratory Technicians](#)  
29-2021 [Dental Hygienists](#)  
29-2031 [Cardiovascular Technologists and Technicians](#)  
29-2032 [Diagnostic Medical Sonographers](#)  
29-2033 [Nuclear Medicine Technologists](#)  
29-2034 [Radiologic Technologists](#)  
29-2035 [Magnetic Resonance Imaging Technologists](#)  
29-2037 Radiologic Technicians  
29-2041 [Emergency Medical Technicians and Paramedics](#)  
29-2051 [Dietetic Technicians](#)  
29-2052 [Pharmacy Technicians](#)  
29-2053 [Psychiatric Technicians](#)  
29-2054 [Respiratory Therapy Technicians](#)  
29-2055 [Surgical Technologists](#)  
29-2056 [Veterinary Technologists and Technicians](#)  
29-2057 [Ophthalmic Medical Technicians](#)  
29-2061 [Licensed Practical and Licensed Vocational Nurses](#)  
29-2071 [Medical Records and Health Information Technicians](#)  
29-2081 [Opticians, Dispensing](#)  
29-2091 [Orthotists and Prosthetists](#)  
29-2092 [Hearing Aid Specialists](#)  
29-2099 [Health Technologists and Technicians, All Other](#)  
29-2799 Health Technologists and Technicians, All Others  
29-9010 Occupational Health and Safety Specialists  
29-9011 [Occupational Health and Safety Specialists](#)  
29-9012 [Occupational Health and Safety Technicians](#)  
29-9092 [Genetic Counselors](#)  
29-9099 [Healthcare Practitioners and Technical Workers, All Other](#)  
29-9799 Health Care Practitioners and Technical Workers, All Other  
31-1011 [Home Health Aides](#)  
31-1012 Nursing Aides, Orderlies, and Attendants  
31-1013 [Psychiatric Aides](#)

31-1014 [Nursing Assistants](#)  
31-1015 [Orderlies](#)  
31-2011 [Occupational Therapy Assistants](#)  
31-2012 [Occupational Therapy Aides](#)  
31-2021 [Physical Therapist Assistants](#)  
31-2022 [Physical Therapist Aides](#)  
31-9011 [Massage Therapists](#)  
31-9091 [Dental Assistants](#)  
31-9092 [Medical Assistants](#)  
31-9093 [Medical Equipment Preparers](#)  
31-9094 [Medical Transcriptionists](#)  
31-9095 [Pharmacy Aides](#)  
31-9096 [Veterinary Assistants and Laboratory Animal Caretakers](#)  
31-9097 [Phlebotomists](#)  
31-9099 [Healthcare Support Workers, All Other](#)  
31-9799 Health Care Support Workers, All Others  
43-6013 [Medical Secretaries](#)  
51-9081 [Dental Laboratory Technicians](#)  
51-9082 [Medical Appliance Technicians](#)  
51-9083 [Ophthalmic Laboratory Technicians](#)

#### Lawyers and Lobbyists

19-4092 [Forensic Science Technicians](#)  
23-1011 [Lawyers](#)  
23-1012 [Judicial Law Clerks](#)  
23-1021 [Administrative Law Judges, Adjudicators, and Hearing Officers](#)  
23-1022 [Arbitrators, Mediators, and Conciliators](#)  
23-1023 [Judges, Magistrate Judges, and Magistrates](#)  
23-2011 [Paralegals and Legal Assistants](#)  
23-2091 [Court Reporters](#)  
23-2092  
23-2093 [Title Examiners, Abstractors, and Searchers](#)  
23-2099 [Legal Support Workers, All Other](#)  
43-4031 [Court, Municipal, and License Clerks](#)

43-6012 [Legal Secretaries](#)

## Transportation

39-6031 Flight Attendants

39-6032 Transportation Attendants

43-5011 [Cargo and Freight Agents](#)

43-5071 [Shipping, Receiving, and Traffic Clerks](#)

49-2091 [Avionics Technicians](#)

49-2093 [Electrical and Electronics Installers and Repairers, Transportation Equipment](#)

49-2096 [Electronic Equipment Installers and Repairers, Motor Vehicles](#)

49-3011 [Aircraft Mechanics and Service Technicians](#)

49-3031 [Bus and Truck Mechanics and Diesel Engine Specialists](#)

49-3042 [Mobile Heavy Equipment Mechanics, Except Engines](#)

49-3043 [Rail Car Repairers](#)

49-9097 [Signal and Track Switch Repairers](#)

51-2011 [Aircraft Structure, Surfaces, Rigging, and Systems Assemblers](#)

51-9122 [Painters, Transportation Equipment](#)

53-1011 [Aircraft Cargo Handling Supervisors](#)

53-1031 [First-Line Supervisors of Transportation and Material-Moving Machine and Vehicle Operators](#)

53-2011 [Airline Pilots, Copilots, and Flight Engineers](#)

53-2012 [Commercial Pilots](#)

53-2021 [Air Traffic Controllers](#)

53-2022 [Airfield Operations Specialists](#)

53-2031 [Flight Attendants](#)

53-3011 [Ambulance Drivers and Attendants, Except Emergency Medical Technicians](#)

53-3021 [Bus Drivers, Transit and Intercity](#)

53-3031 [Driver/Sales Workers](#)

53-3032 [Heavy and Tractor-Trailer Truck Drivers](#)

53-3033 [Light Truck or Delivery Services Drivers](#)

53-3041 [Taxi Drivers and Chauffeurs](#)

53-3099 [Motor Vehicle Operators, All Other](#)

53-4011 [Locomotive Engineers](#)

53-4012 [Locomotive Firers](#)

53-4013 [Rail Yard Engineers, Dinkey Operators, and Hostlers](#)  
53-4021 [Railroad Brake, Signal, and Switch Operators](#)  
53-4031 [Railroad Conductors and Yardmasters](#)  
53-4041 [Subway and Streetcar Operators](#)  
53-4099 [Rail Transportation Workers, All Other](#)  
53-5011 [Sailors and Marine Oilers](#)  
53-5021 [Captains, Mates, and Pilots of Water Vessels](#)  
53-5022 [Motorboat Operators](#)  
53-5031 [Ship Engineers](#)  
53-6011 [Bridge and Lock Tenders](#)  
53-6021 [Parking Lot Attendants](#)  
53-6031 [Automotive and Watercraft Service Attendants](#)  
53-6041 [Traffic Technicians](#)  
53-6051 [Transportation Inspectors](#)  
53-6061 [Transportation Attendants, Except Flight Attendants](#)  
53-6099 [Transportation Workers, All Other](#)  
53-7051 [Industrial Truck and Tractor Operators](#)  
53-7061 [Cleaners of Vehicles and Equipment](#)  
53-7062 [Laborers and Freight, Stock, and Material Movers, Hand](#)  
53-7121 [Tank Car, Truck, and Ship Loaders](#)  
53-7199 [Material Moving Workers, All Other](#)

## Government

13-1061 Emergency Management Specialists  
19-3051 [Urban and Regional Planners](#)  
33-1011 [First-Line Supervisors of Correctional Officers](#)  
33-1012 [First-Line Supervisors of Police and Detectives](#)  
33-1021 [First-Line Supervisors of Fire Fighting and Prevention Workers](#)  
33-1099 [First-Line Supervisors of Protective Service Workers, All Other](#)  
33-2011 [Firefighters](#)  
33-2021 [Fire Inspectors and Investigators](#)  
33-2022 [Forest Fire Inspectors and Prevention Specialists](#)  
33-3011 [Bailiffs](#)  
33-3012 [Correctional Officers and Jailers](#)

33-3021 [Detectives and Criminal Investigators](#)  
33-3031 [Fish and Game Wardens](#)  
33-3041 [Parking Enforcement Workers](#)  
33-3051 [Police and Sheriff's Patrol Officers](#)  
33-3052 [Transit and Railroad Police](#)  
33-9011 [Animal Control Workers](#)  
33-9031 [Gaming Surveillance Officers and Gaming Investigators](#)  
33-9091 [Crossing Guards](#)  
33-9093 [Transportation Security Screeners](#)  
33-9099 [Protective Service Workers, All Other](#)  
43-5031 [Police, Fire, and Ambulance Dispatchers](#)  
43-5032 [Dispatchers, Except Police, Fire, and Ambulance](#)  
43-5051 [Postal Service Clerks](#)  
43-5052 [Postal Service Mail Carriers](#)  
43-5053 [Postal Service Mail Sorters, Processors, and Processing Machine Operators](#)

### Dependent and Independent Variable Descriptions

| Variable Name                                         | Mean   | Standard<br>Deviation | Minimum<br>Value | Maximum<br>Value |
|-------------------------------------------------------|--------|-----------------------|------------------|------------------|
| Percentage change in annual per capita state spending | 0.01   | 0.08                  | −0.23            | 0.66             |
| Percentage change in annual per capita state debt     | 0.01   | 0.07                  | −0.24            | 0.36             |
| Ranney index of state party competition               | 0.60   | 0.24                  | 0                | 0.99             |
| Interest group policy diversity                       | 48.84  | 39.08                 | 0                | 208.69           |
| Interest group competition for members                | 1.32   | 0.88                  | 0                | 9.21             |
| Major industry dominates potential members            | 0.96   | 0.59                  | 0                | 3.89             |
| Per capita gross state product                        | 6.88   | 2.27                  | 3.00             | 49.97            |
| Per capita income                                     | 31,435 | 6,869                 | 19,096           | 56,245           |
| Lagged state debt in millions of 2000 dollars         | 16.61  | 21.44                 | 0.67             | 117.65           |
| Great recession (2008 and 2009)                       | 0.20   | 0.40                  | 0                | 1                |
| Index of gubernatorial budget powers                  | 3.47   | 1.00                  | 1                | 5                |
| Index of legislative professionalism                  | 0.20   | 0.11                  | 0.03             | 0.63             |
| Ranking of state tax and spending laws                | 9.01   | 8.31                  | 0                | 30               |
| State political ideology                              | 48.28  | 28.35                 | 2.58             | 92.45            |
| Legislature controlled by Democrats                   | 0.49   | 0.50                  | 0                | 1                |
| Governor is a Democrat                                | 0.45   | 0.50                  | 0                | 1                |
| State labor unions                                    | 28.14  | 23.00                 | 0                | 151              |

### Alternative analysis

Before drawing conclusions, though, there is another potential concern we ought to address. Some interest group scholars argue that it is policy activity by governments that drives interest group formation, rather than more groups driving more policy making (Gray et al. 2005; Leech et al. 2005), and this may be true of state spending as well. To test this counter-argument, we estimate a model where the dependent variable is the percentage year-to-year change in the number of interest groups per capita in each state. Our percent change in spending, the dependent variable in the spending model in Table 2, is the key independent variable here, and should exhibit a positive and significant effect on increases in group numbers if there is a relationship between greater government spending and group mobilization. We also include many of the other control variables, as seen in the table below, along with our measures of group competition over policy and for members, since these might also contribute to greater increases in the overall number of state interest groups. Indeed, the interest group measures do, as seen in the results in the table below, being both positive and significant. Yet they are the only significant variables. Increases in state spending fails to have any effect on growing numbers of organized interests, helping us feel more secure in drawing conclusions from the results in Table 1 in the paper.

Estimates of Spending on Percentage Increase in State Interest Groups, 2006 – 2015  
Maximum likelihood estimates (robust standard errors)

| Explanatory variable                           | Change in<br>group<br>population |
|------------------------------------------------|----------------------------------|
| Percentage change in per capita state spending | 0.10<br>(0.36)                   |
| Interest group competition for members         | 0.16***<br>(0.03)                |
| Interest group competition over policy         | 0.01***                          |

---

|                                               |                 |
|-----------------------------------------------|-----------------|
|                                               | (0.01)          |
| Party competition (Ranney index)              | 0.41<br>(0.33)  |
| Per capita gross state product                | -0.00<br>(0.01) |
| Per capita income                             | -0.00<br>(0.01) |
| Recession years (2008 and 2009)               | -0.06<br>(0.09) |
| State political ideology                      | -0.00<br>(0.00) |
| Governor's budget powers                      | -0.05<br>(0.03) |
| State has laws restricting taxes and spending | 0.00<br>(0.00)  |
| Squire's index of legislative professionalism | -0.38<br>(0.41) |
| Constant                                      | -0.34<br>(0.34) |
| Wald $\chi^2$ of model fit                    | 33.69***        |
| <i>N</i>                                      | 441             |

---

\*  $p < 0.05$     \*\*  $p < 0.01$     \*\*\*  $p < 0.005$

## References

- Benz, Jennifer, Justin H. Kirkland, Virginia Gray, David Lowery, Jennifer Sykes, and Mary Deason. 2011. "Mediated Density: The Indirect Relationship between U.S. State Public Policy and PACs." *State Politics & Policy Quarterly* 11(December): 440-459.
- Gray, Virginia, John Cluverius, Jeffrey J. Harden, Boris Shor, and David Lowery. 2015. "Party Competition, Party Polarization, and the Changing Demand for Lobbying in the American States." *American Politics Research* 43(2): 175-204.
- Holyoke, Thomas T. 2015. "Challenges of Integrating Levels of Analysis in Interest Group Research." In *The Organization Ecology of Interest Communities: Assessment and Agenda*, eds. David Lowery, Darren Halpin, and Virginia Gray, pp. 79-97. London: Palgrave-Macmillan.
- Leech, Beth L., Frank R. Baumgartner, Timothy M. LaPira, and Nicholas A. Semanko. 2005. "Drawing Lobbyists to Washington: Government Activity and the Demand for Advocacy." *Political Research Quarterly* 58(March): 19 – 30.
- McGovern, Geoffrey and Michael D. Greenberg. 2014. "Shining a Light on State Campaign Finance: An Evaluation of the Impact of the National Institute on Money in State Politics." Evaluation Report by the Institute for Civil Justice at the RAND Corporation. See <http://www.followthemoney.org/assets/press/RAND-report-Aug-2014/RAND-NIMSP-Report.pdf>.

---

<sup>1</sup> The organization's current website is <http://www.followthemoney.org/>. Overall it can be perhaps best described as a state-level counterpart to the better known Center for Responsive Politics, which tracks interests groups, lobbying, and campaign spending in Washington, DC.

---

<sup>2</sup> After 2012 the Institute stopped making this data available, at least for a time. We received it for 203 to 2015 by special request.

<sup>3</sup> The McGovern and Greenberg reference is to the second, 2014, evaluation report. The first report is not available, though the Institute published a summary paragraph from the report on its website at <http://www.followthemoney.org/our-data/rand-evaluations/>. In the summary paragraph RAND researchers summed by writing “Overall, NIMSP is a professional, well-managed institution that can be proud of its processes and people, and of the integrity and validity of the valuable research data and products they make available to the world in a useful form.”

<sup>4</sup> Even so, it is not entirely clear that this project is still ongoing at the Institute.

<sup>5</sup> Information on these employment classifications, as well as the actual data, can be found at <http://www.bls.gov/oes/tables.htm>.
